# Supplementary material for: A common promoter hypomethylation signature in invasive breast, liver and prostate cancer cell lines reveals novel targets involved in cancer invasiveness
Source: PubMed Central journal article supplement (PMC4741763; doi:10.18632/oncotarget.5291), 2015-09-22
Supplement: oncotarget-06-33253-s001.pdf [file oncotarget-06-33253-s001.pdf]

## SUPPLEMENTAL TABLES

**Supplementary Table S1: Primer sequences used for qPCR and in pyrosequencing.** List of shRNA sequences used in the study

| Primers used for QPCR |              |                                                                     |
|-----------------------|--------------|---------------------------------------------------------------------|
| Genes                 | Accession #  | Primer sequences for QPCR                                           |
| ANXA3                 | NM_004039    | For: 5' CGGCCAGCTTCCTTCAAAT 3'<br>Rev: 5' CCATATGCACTTGGGGGTGT3'    |
| C11ORF68              | NM_031450    | For: 5' TGAGGAGCTGGAAGAGGAGG 3'<br>Rev: 5' CAAACACTAGCCAGGGGTCC 3'  |
| CD44                  | NM_000610    | For: 5' AGCAACTGAGACAGCAACCA 3'<br>Rev: 5' AGACGTACCAGCCATTTGTGT 3' |
| G0S2                  | NM_015714    | For: 5' GCCGTGCCACTAAGGTCATT 3'<br>Rev: 5' GATCAGCTCCTGGACCGTTT 3'  |
| ELK3                  | NM_005230    | For: 5' TTACAAGAGCCACAGACCGT 3'<br>Rev: 5' TGCACTCTCCATACCCAGATG 3' |
| FLNC                  | NM_001458    | For: 5' GAGGAGGAGCCCTCTGAAGT 3'<br>Rev: 5' CTCTGTGGCCAGTGTGTG 3'    |
| HAS3                  | NM_138612    | For: 5' ACTACATCCAGGTGTGCGAC 3'<br>Rev: 5' TGGACATCTCCCCGACTC 3'    |
| PLEC1                 | NM_201380    | For: 5' AGGAGCTTGAGGAGGTGTCA 3'<br>Rev: 5' CGATCCCGCTCATCTGTGG 3'   |
| Rab34                 | NM_031934    | For: 5' GCCCTGAAGGAGAATGACCC 3'<br>Rev: 5' AGCAGGGGTACTCAGATCCT 3'  |
| SHISA2                | NM_001007538 | For: 5' CTCGGCAGTGCCCATCTAC 3'<br>Rev: 5' GCTTAGGCCGGAGACATCTG 3'   |
| TMEM156               | NM_024943    | For: 5' AGAGTGCAAAGTGGCAGAGT 3'<br>Rev: 5' TGCGTGGTCTCTGCTGAAAG 3'  |

## Primer sequences used for pyrosequencing

| Gene  | Accession # | Primer sequences for pyrosequencing                                                                                   | Annealing temperature [°C] | Amplicon length [bp] |
|-------|-------------|-----------------------------------------------------------------------------------------------------------------------|----------------------------|----------------------|
| ANXA3 | NM_004039   | FW 5'- AGTTTGGGTTGGGAGGTAA-3'<br>Rv Bio 5'-CCCCACCCCCCTCAAACACTACC<br>TACT- 3' Seq 5'- GGGTTGGGAGGTAAA-3'             | 55                         | 155                  |
| ELK3  | NM_005230   | FW 5'- GGAATGATGGGGTTTTTTTATTGA<br>TA-3' Rv Bio 5'- ACATCCTATACTCATATCCAC<br>TAACT- 3' Seq 5'- GTTTTTAAGGTGTTGGTAG-3' | 55                         | 283                  |
| PLEC1 | NM_201380   | FW Bio 5'- GGGAGGGTAGGTAGGTTG-3'<br>Rv 5'- CTCTTAAAATACCCCCCACTC - 3'<br>Seq 5'- ACAATACCCACAAAAATTACAC -3'           | 55                         | 116                  |
| PLEC1 | NM_201380   | FW 5' - GGGAGGGTAGGTAGGTTG-3'<br>Rv Bio 5'- CTCTTAAAATACCCCCCACTC - 3'<br>Seq 5'- TGTAGGTTGTTAGTTTTTTTTTAGG -3'       | 55                         | 116                  |

**Primer sequences used for pyrosequencing**

| Gene            | Accession #  | Primer sequences for pyrosequencing                                                                                       | Annealing temperature [°C] | Amplicon length [bp] |
|-----------------|--------------|---------------------------------------------------------------------------------------------------------------------------|----------------------------|----------------------|
| <b>C11orf68</b> | NM_031450    | FW 5' -GGTGTTTGGGTTTTTTTTGAGT-3'<br>Rv Bio 5'- AACCCCTTATCCCATCCATATAA<br>TT- 3' Seq 5'- GGATTTGGTGGTATTTGT-3'            | 52                         |                      |
| <b>G0S2</b>     | NM_015714    |                                                                                                                           |                            |                      |
| <b>SHISA2</b>   | NM_001007538 | FW Bio 5' - GTTTTTTGGGTATTTTAAAGATATGAAGT-3'<br>Rv Bio 5'- AACCCCTTATCCCATCCATATAATT- 3'<br>Seq 5'- GGATTTGGTGGTATTTGT-3' | 52                         |                      |
| <b>TMEM156</b>  | NM_024943    | FW Bio 5' - ATGATTTTAAAGAAGTAAGGGGAT<br>TT-3' Rv Bio 5'- TCCTTCTACCTTAACCTCCCA<br>AAATA - 3' Seq 5'- CCACTTCCCCCAACCC-3'  | 52                         |                      |

**shRNAs sequences used for genes knockdown experiments:****List of shRNA sequences used in the study (Open Biosystems).**

| Catalog #                    | #   | Mature Antisense                                                                                |
|------------------------------|-----|-------------------------------------------------------------------------------------------------|
| ShScr [RHS4346]              |     | (non-silencing GIPZ lentiviral shRNAmir control; contains no homology to known mammalian genes) |
| ShC11orf68 [RHS4531-EG83638] | #5  | V3LHS_306327 AGTCGTCCGTGTAAACACA                                                                |
|                              | #6  | V3LHS_306330 AAACACAGATGACCTGGCG                                                                |
|                              | #7  | V3LHS_306329 AGGTCAGTTCCACGTTGTT                                                                |
|                              | #8  | V3LHS_306328 CTGAGTTGGGTGAACCGGG                                                                |
| ShG0S2 [RHS4531-EG50486]     | #5  | V3LHS_411679 TAGATAATCACACAGTGT                                                                 |
|                              | #6  | V3LHS_381561 ACAGCTTCACCATCTCCC                                                                 |
|                              | #7  | V3LHS_411678 TTCTCTGAAGTTAAGTCCA                                                                |
| ShSHISA2 [RHS4531-EG387914]  | #2  | V3LHS_392556 TCAGCACAGAGAAATTCGT                                                                |
|                              | #3  | V3LHS_413361 TTTTATCAGATCTAGGCA                                                                 |
|                              | #4  | V3LHS_413362 AAGATAAATCAAGAAGGG                                                                 |
| ShTMEM156 [RHS4531-EG80008]  | #3  | V3LHS_344689 AGATTGCAAACACTTCC                                                                  |
|                              | #10 | V2LHS_176950 ATCGATTCTCCTTGCTTG                                                                 |

**Supplementary Table S2: See Supplementary File S1.** List of 2961 hypomethylated and 5368 hypermethylated CG sites and corresponding genes in all invasive (MDA-MB-231, SKHep1 and PC3) cancer cell lines when compared to non-invasive counterparts (MCF7, HepG2 and LNCaP). Target ID represents a single CpG locus in Illumina450K methylation bead array. dist-to-tss- indicated the distance from target CpG to transcription start site. Average beta value estimate of methylation level and delta beta is the differential methylation values between invasive and it's non-invasive counterpart

**Supplementary Table S3: A.** List of genes hypomethylated more than 25% with  $P$ -value  $< 0.05$  in invasive cancer cell lines involved in epithelial-mesenchymal transition pathway.

| # | Genes | Entrez Gene Name                                                                 |
|---|-------|----------------------------------------------------------------------------------|
| 1 | NDRG1 | N-myc downstream regulated 1                                                     |
| 2 | PLAU  | plasminogen activator                                                            |
| 3 | PLAUR | plasminogen activator, urokinase receptor                                        |
| 4 | SMAD3 | SMAD family member 3                                                             |
| 5 | STAT3 | signal transducer and activator of transcription 3 (acute-phase response factor) |
| 6 | STMN1 | stathmin 1                                                                       |
| 7 | THRB  | thyroid hormone receptor, beta                                                   |
| 8 | VIM   | Vimentin                                                                         |

**B. Sixteen genes involved in TGF beta pathway out of 235 hypomethylated genes, which are not known to be involved in cancer or cancer metastasis**

| #  | Symbol   | Entrez Gene Name                                        |
|----|----------|---------------------------------------------------------|
| 1  | ACSS1    | acyl-CoA synthetase short-chain family member 1         |
| 2  | AMOTL2   | angiominin like 2                                       |
| 3  | CDC42EP3 | CDC42 effector protein (Rho GTPase binding) 3           |
| 4  | ECE1     | endothelin converting enzyme 1                          |
| 5  | FXYP5    | FXYP domain containing ion transport regulator 5        |
| 6  | GNG7     | guanine nucleotide binding protein (G protein), gamma 7 |
| 7  | HAS3     | hyaluronan synthase 3                                   |
| 8  | HMOX2    | heme oxygenase (decycling) 2                            |
| 9  | KLRD1    | killer cell lectin-like receptor subfamily D, member 1  |
| 10 | MAP4     | microtubule-associated protein 4                        |
| 11 | MFAP2    | microfibrillar-associated protein 2                     |
| 12 | MRPS6    | mitochondrial ribosomal protein S6                      |
| 13 | NCAN     | neurocan                                                |
| 14 | PLS3     | plastin 3                                               |
| 15 | TRIM2    | tripartite motif containing 2                           |
| 16 | ZMIZ1    | zinc finger, MIZ-type containing 1                      |

**Supplementary Table S4:** *See Supplementary File S2.* Hypomethylated in invasive cancer cells genes involved in movement, migration and invasion assessed by IPA analysis

**Supplementary Table S5: List of differentially methylated genes in our study and publicly available DCIS and IBC methylation data**

Common genes in our study and genes diff methylated in DCIS and IDC      Common genes in MCF7 vs. MDA in DCIS-IDC

|           |          |
|-----------|----------|
| PLAT      | FAIM2    |
| SCN2A     | PPP2R1B  |
| PDZK1     | PLAT     |
| MTMR7     | SCN2A    |
| C19orf77  | PSG3     |
| ZNF704    | PEBP4    |
| PLCH2     | KHDC1L   |
| PSG2      | OPA3     |
| ZAP70     | PDZK1    |
| CIB3      | MTMR7    |
| LOC284837 | C5orf52  |
| ZNF423    | MYADML2  |
| ITGA6     | TRIM29   |
| POU2AF1   | MIR200B  |
| COX4I2    | LRRTM2   |
| ADCY8     | HMGCS2   |
| GRIP1     | HTRA3    |
| HEXA      | MED24    |
| SESN3     | ZNF704   |
| CHRM5     | FOXS1    |
| ARSJ      | PLCH2    |
| HOXA3     | SERPINA1 |
| DENND5A   | B3GNT1   |
| GUCY1B2   | HYAL2    |
| LPAR3     | CAPN8    |
| PAM       | ZNF154   |
|           | CASP4    |
|           | PSG2     |
|           | ZAP70    |
|           | FADS1    |
|           | C11orf52 |

(Continued)

**Common genes in our study and genes diff methylated in DCIS and IDC**

|  |           |
|--|-----------|
|  | SYCN      |
|  | LOC148696 |
|  | CIB3      |
|  | RNF212    |
|  | ASB10     |
|  | PACSIN2   |
|  | PNMAL2    |
|  | LOC284837 |
|  | CABP1     |
|  | PGLYRP2   |
|  | TGM5      |
|  | THAP4     |
|  | PRAF2     |
|  | USP35     |
|  | KCNK16    |
|  | CPA1      |
|  | DEFB135   |
|  | PHGR1     |
|  | GPRC5B    |
|  | AHR       |
|  | ZNF423    |
|  | FAM101A   |
|  | SERPINA11 |
|  | EGR1      |
|  | ITGA6     |
|  | C9orf152  |
|  | MCCC2     |
|  | ELN       |
|  | CUL7      |
|  | ATXN3L    |
|  | C4orf6    |
|  | POU2AF1   |
|  | TMPRSS13  |
|  | TM2D3     |
|  | COX4I2    |

(Continued)

**Common genes in our study and genes diff methylated in DCIS and IDC**      **Common genes in MCF7 vs. MDA in DCIS-IDC**

|  |         |
|--|---------|
|  | RHOC    |
|  | GLRB    |
|  | PRRT1   |
|  | FAM83E  |
|  | ZBTB10  |
|  | ADCY8   |
|  | ATOH8   |
|  | BTBD10  |
|  | LMOD1   |
|  | KCTD14  |
|  | BEND6   |
|  | GRIP1   |
|  | TMEM26  |
|  | PGR     |
|  | SESN3   |
|  | FKBP1A  |
|  | DAXX    |
|  | PLOD1   |
|  | SPEN    |
|  | CHRM5   |
|  | TFF3    |
|  | TRAF5   |
|  | ICAM2   |
|  | ANKK1   |
|  | ARSJ    |
|  | HOXA3   |
|  | SLC6A9  |
|  | HPGDS   |
|  | MSL3    |
|  | CPA2    |
|  | CARS    |
|  | TELO2   |
|  | P4HA3   |
|  | DENND5A |
|  | FAM198B |

(Continued)

**Common genes in our study and genes diff methylated in DCIS and IDC**      **Common genes in MCF7 vs. MDA in DCIS-IDC**

|  |         |
|--|---------|
|  | GUCY1B2 |
|  | MMP20   |
|  | ZNF776  |
|  | LPAR3   |
|  | LMAN2   |
|  | PGPEP1  |
|  | VPS18   |
|  | PAM     |
|  | APOBEC4 |
|  | HYALP1  |
|  | KRT5    |
|  | PLG     |
|  | STAP2   |

**Supplementary Table S6:** *See Supplementary File S3.* Common genes in hypomethylated in invasive cancer cell lines: MDA-MB-231, SKHep1 and PC3 and in breast, liver and prostate invasive tissues consequently

**Supplementary Table S7:** *See Supplementary File S4.* List of the genes, hypomethylated and induced in invasive cancer cell lines

**Supplementary Table S8:** *See Supplementary File S5.* Immunohistochemistry analysis for C11orf68, G0S2, SHISA2 and TMEM156 expression in breast, liver and prostate cancer
